# Supplementary material for: Top-Down Preparation of Nanoquartz for Toxicological Investigations
Source: MDPI journal article supplement (doi:10.3390/ijms232315425), 2022-12-06
Supplement: s1 [file s1]

## Supplementary Material

**Chiara Bellomo** <sup>1,2</sup>, **Cristina Pavan** <sup>1,2,3</sup>, **Gianluca Fiore** <sup>1,4</sup>, **Guillermo Escolano-Casado** <sup>1,4</sup>, **Lorenzo Mino** <sup>1,4</sup>  
and **Francesco Turci** <sup>1,2,4,\*</sup>

<sup>1</sup> Department of Chemistry, University of Turin, 10125 Turin, Italy

<sup>2</sup> “G. Scansetti” Interdepartmental Centre for Studies on Asbestos and Other Toxic Particulates, University of Turin, 10125 Turin, Italy

<sup>3</sup> Louvain Centre for Toxicology and Applied Pharmacology, Université catholique de Louvain, 1200 Brussels, Belgium

<sup>4</sup> Nanostructured Interfaces and Surfaces Interdepartmental Centre, University of Turin, 10125 Turin, Italy

\* Correspondence: francesco.turci@unito.it; Tel.: +39-011-6707566

This document includes:

1. FE-SEM micrographs of gQ-n1, gQ-n2 and gQ-n3;
2. DLS analysis of gQ-n1 and gQ-n2;
3. TEM micrographs of gQ-n3;
4. SEM-EDS analysis of gQ before milling;
5. Full range IR spectra ( $1300\text{ cm}^{-1} - 4000\text{ cm}^{-1}$ ) of gQ-n1, n2, and n3 before and after D<sub>2</sub>O exchange.

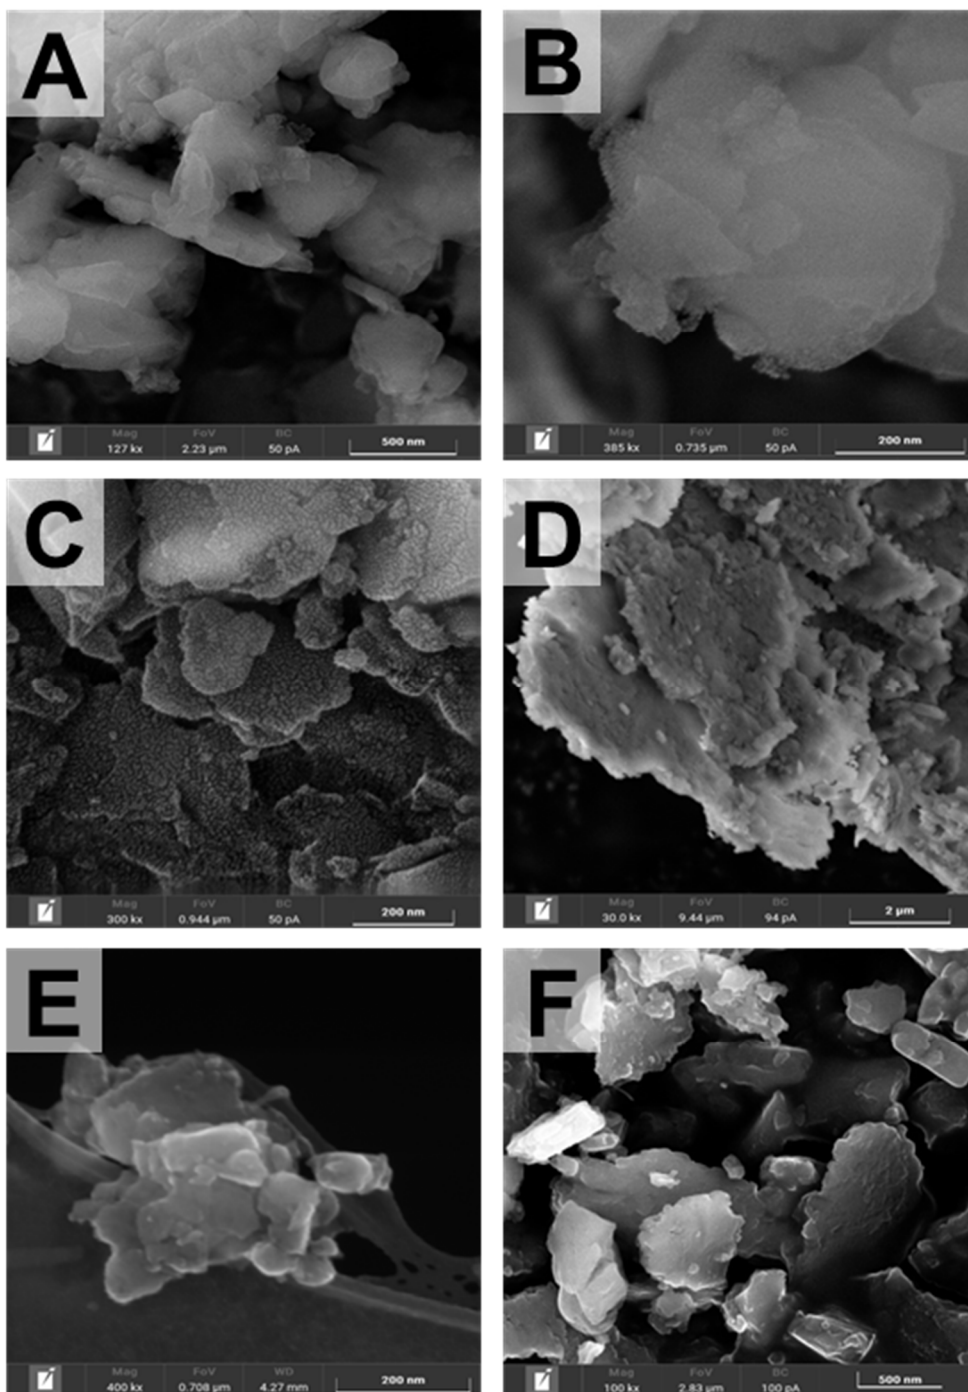

**Figure S1.** SEM micrographs of (A-B) gQ-n1, (C-D) gQ-n2, (E-F) gQ-n3 at various magnification (reported on the micrographs).

## gQ-n1

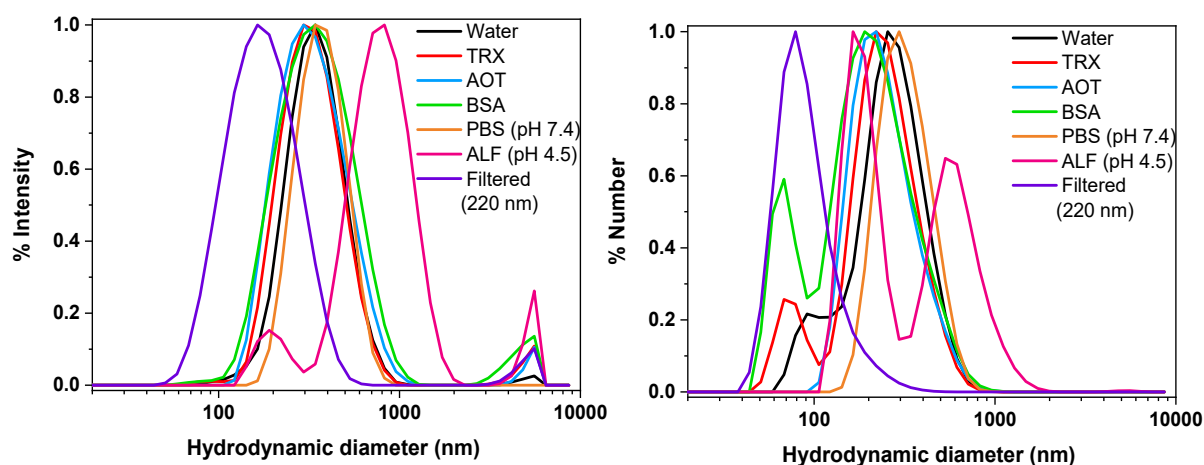

## gQ-n2

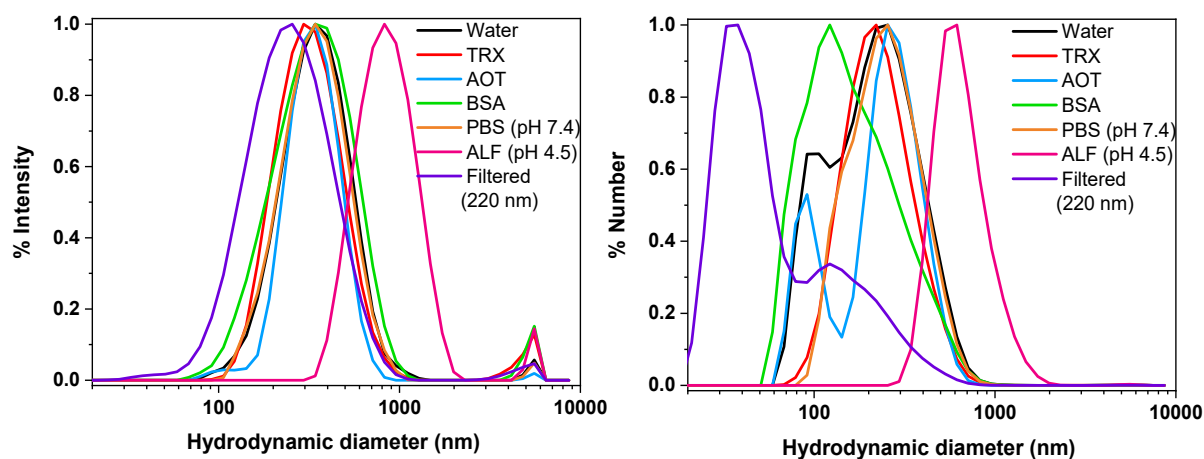

**Figure S2.** Hydrodynamic size reported in intensity-distribution and number-distribution of gQ-n1 and gQ-n2 measured by DLS analysis. Particles were dispersed in water and in different biologically relevant media, i.e., Triton X (TRX), dioctyl sulfosuccinate sodium salt (AOT), bovine serum albumin (BSA), phosphate buffered saline (PBS, 10 mM, pH 7.4), artificial phagolysosome fluid (ALF, pH 4.5), and filtered through 200-nm pore size filter.

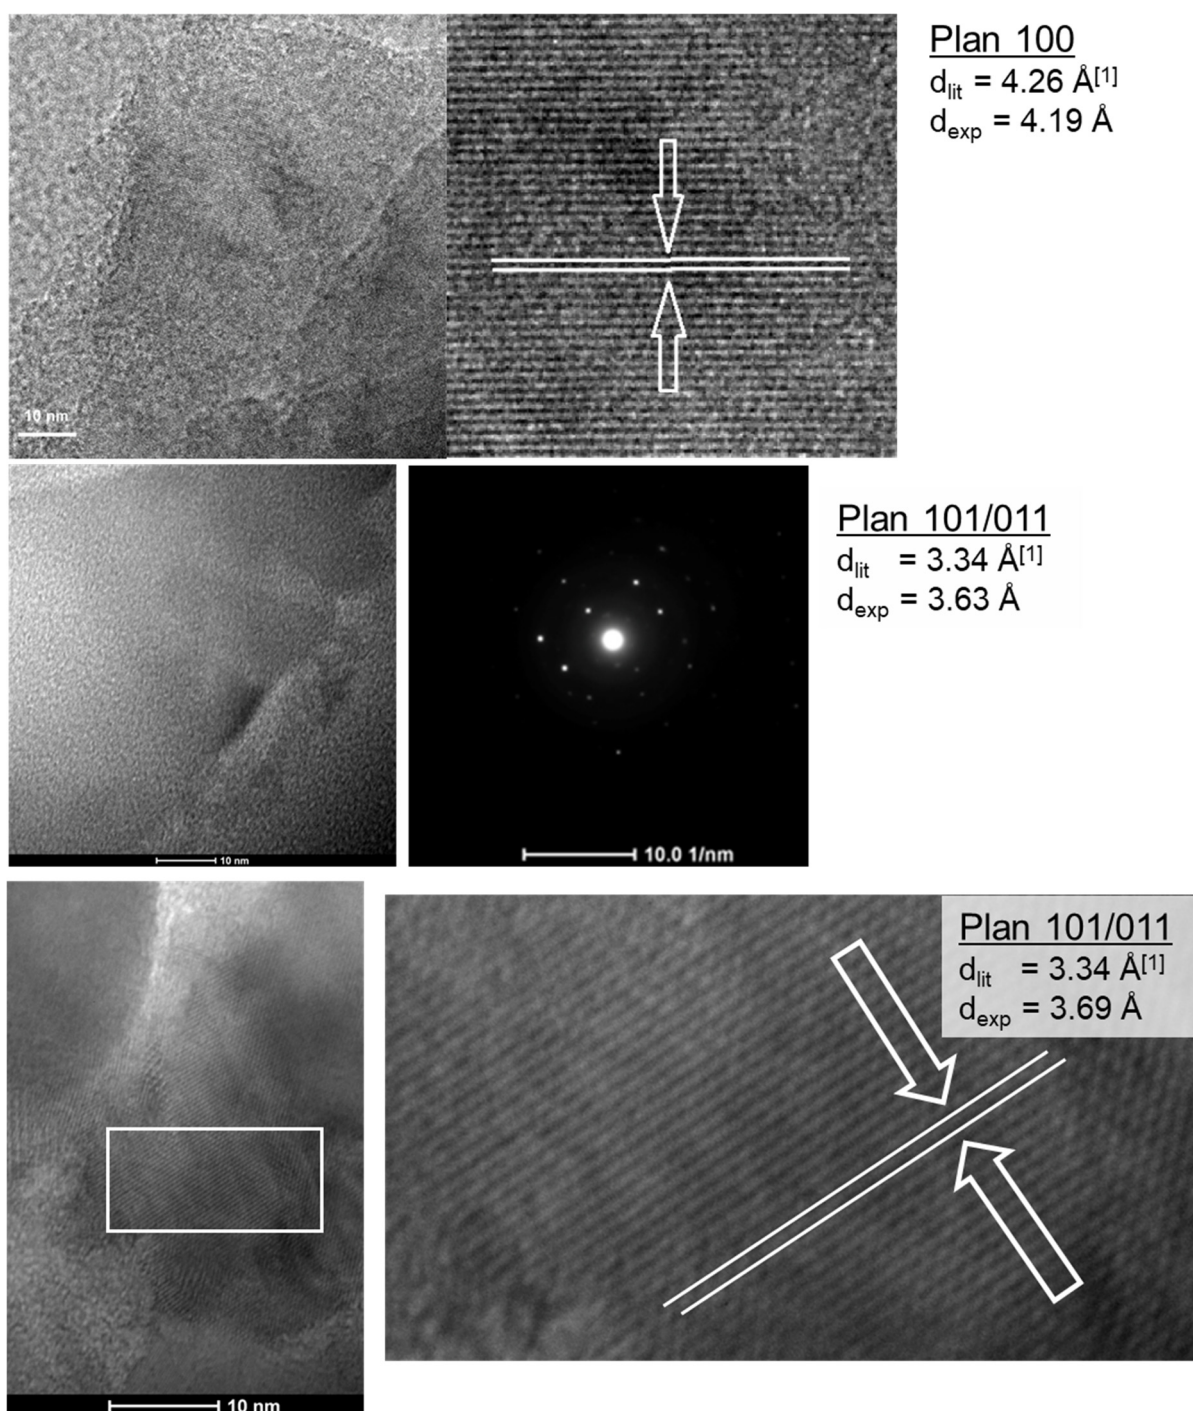

**Figure S3:** Elaboration of TEM data and individuation of the crystal planes of gQ-n3.

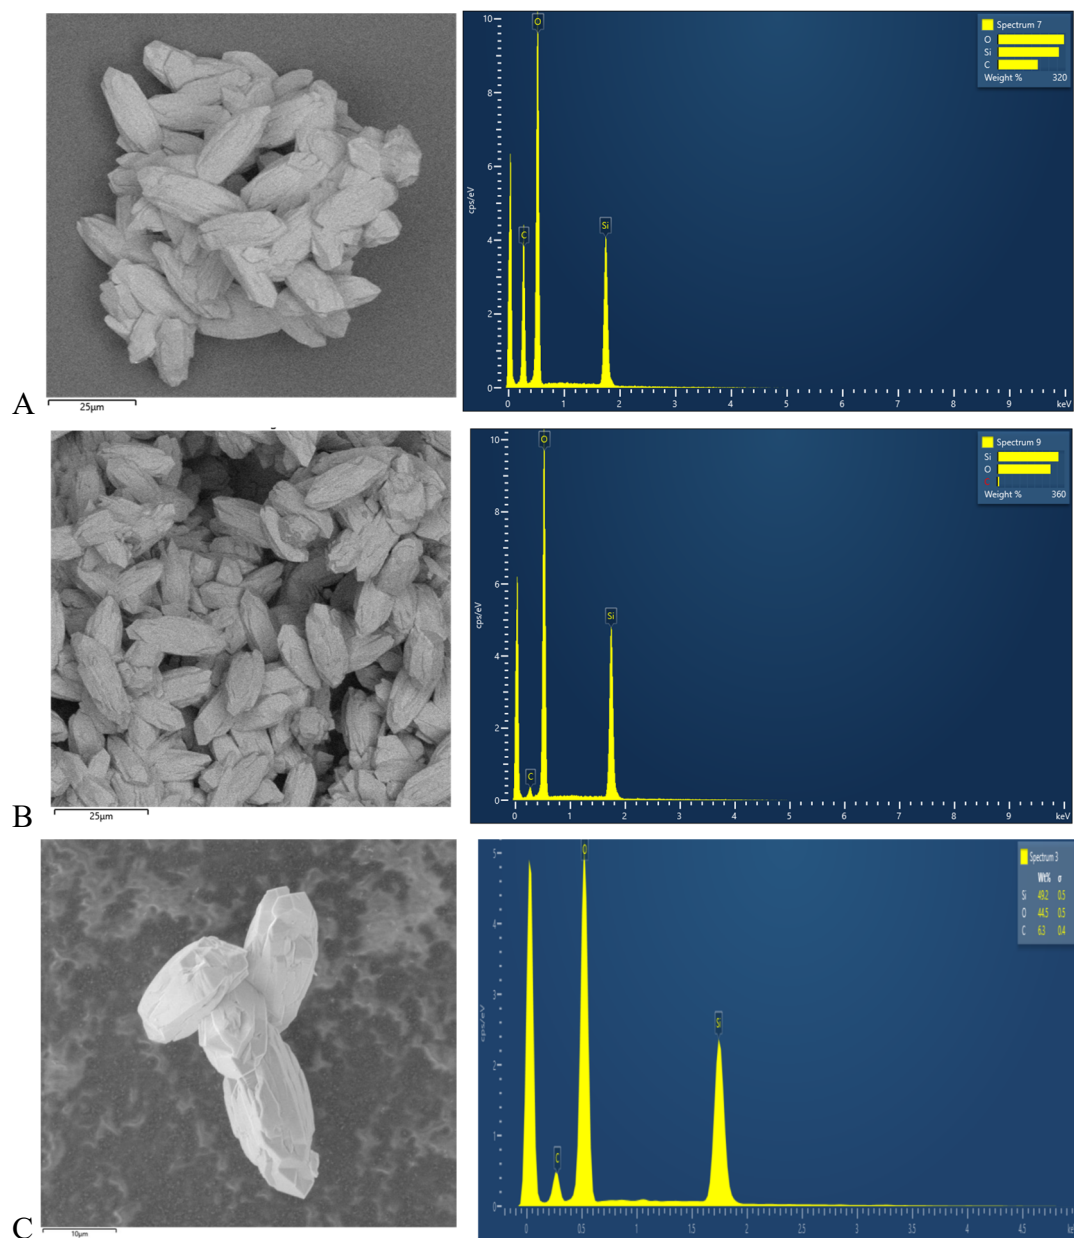

Figure S4: SEM-EDS images (BSE electrons) analysis of some batches of the synthesized gQ samples. In all cases, only Si and O were detected. The presence of C is due to the SEM conductive tape.

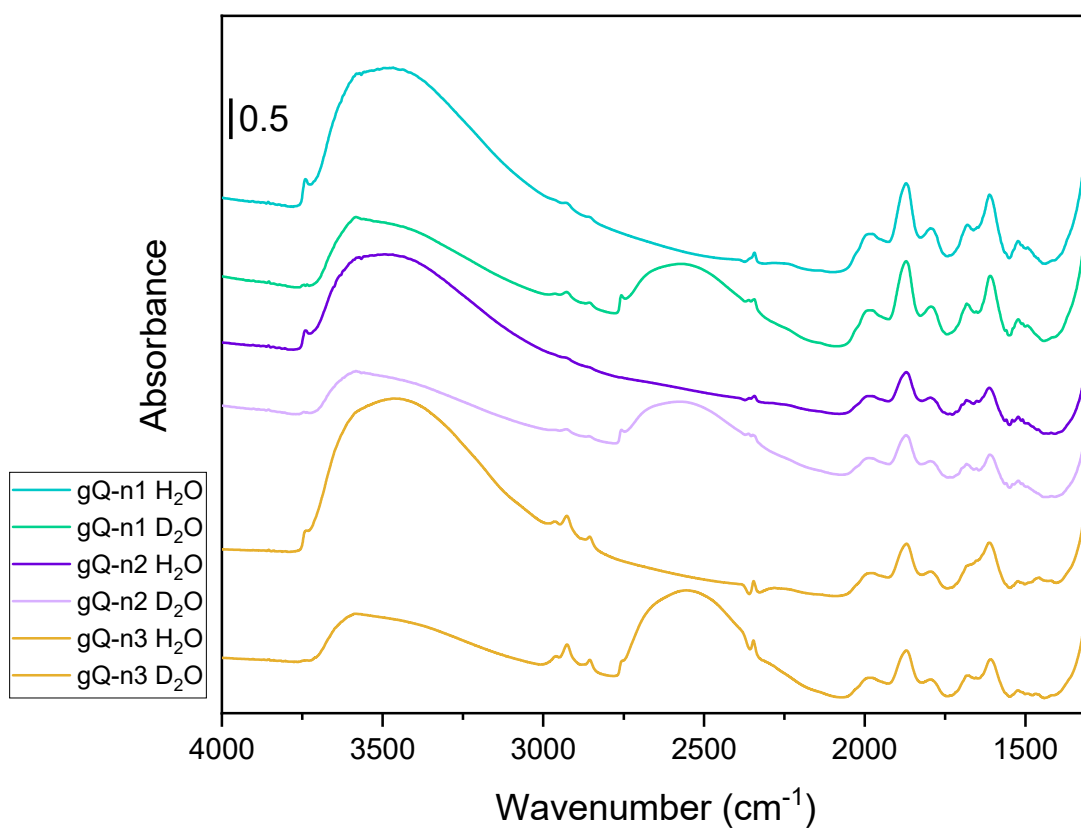

Figure S5: Full range IR spectra of gQ-n1, n2, and n3 before and after  $\text{D}_2\text{O}$  exchange.
